# Supplementary material
Source: PubMed Central journal article supplement (PMC6990734)
Supplement: jamadermatol-156-270-s001.pdf [file jamadermatol-156-270-s001.pdf]

## Supplementary Online Content

Nelson CA, Zhong CS, Hashemi DA, et al. A multicenter cross-sectional study and systematic review of necrobiotic xanthogranuloma with proposed diagnostic criteria. *JAMA Dermatology*. Published online January 15, 2020.  
doi:10.1001/jamadermatol.2019.4221

**eTable.** Systematic Review of the Demographics, Comorbidities, and Clinical Features of Necrobiotic Xanthogranuloma  
**eReferences.**

This supplementary material has been provided by the authors to give readers additional information about their work.

**eTable. Systematic Review of the Demographics, Comorbidities, and Clinical Features of Necrobiotic Xanthogranuloma**

| Al-Bermani et al. <sup>1</sup> , 2009   | 47 | F | W  | IgG kappa                          | Red or pink papules on the extremities.                                       | Pain | Eye                                      |    | L  |    |  |  |
|-----------------------------------------|----|---|----|------------------------------------|-------------------------------------------------------------------------------|------|------------------------------------------|----|----|----|--|--|
| Al-Niaimi et al. <sup>2</sup> , 2010    | 42 | M |    |                                    | Yellow or orange atrophic plaques on the face.                                | None |                                          |    | NL | No |  |  |
| AlGain et al. <sup>3</sup> , 2017       | 81 | M |    | IgG kappa, MM                      | Yellow or orange papules on the face, trunk, and extremities.                 |      | Gastrointestinal tract                   |    | L  |    |  |  |
| Ali et al. <sup>4</sup> , 2012          | 59 | M |    | IgG lambda                         | Yellow or orange papules on the extremities.                                  |      | Eye                                      | H  | NL |    |  |  |
| Amer et al. <sup>5</sup> , 2005         | 31 | F |    | IgG kappa                          | Plaques in a periorbital distribution.                                        |      | Eye and liver                            |    |    |    |  |  |
| Bain et al. <sup>6</sup> , 2014         | 78 | M |    | IgG kappa, MM                      | Purple indurated papule on the extremities.                                   | None |                                          |    |    |    |  |  |
| Balagula et al. <sup>7</sup> , 2011     | 77 | M |    | IgM, Waldenstrom macroglobulinemia | Red or pink indurated plaques on the extremities.                             |      |                                          |    |    |    |  |  |
| Barzilai et al. <sup>8</sup> , 1996     | 85 | F |    | IgG kappa                          | Purple atrophic plaques on the face, trunk, and extremities.                  | None |                                          |    |    |    |  |  |
| Betts et al. <sup>9</sup> , 2001        | 58 | M | W  | IgG lambda                         | Red or pink ulcerated papules and nodules on the extremities.                 |      |                                          |    |    |    |  |  |
| Bhari et al. <sup>10</sup> , 2015       | 75 | M |    | IgG kappa                          | Red or pink atrophic plaques on the face, trunk, and extremities.             |      |                                          |    |    |    |  |  |
| Bortolani et al. <sup>11</sup> , 1999   | 72 | F | W  | IgG kappa, MM                      | Yellow or orange nodules in a periorbital distribution.                       |      |                                          |    |    |    |  |  |
| Bullock et al. <sup>12</sup> , 1986     | 57 | F | W  | IgG kappa, MM                      | Yellow or orange indurated nodules in a periorbital distribution.             |      | Eye                                      |    |    |    |  |  |
| Burdick et al. <sup>13</sup> , 2003     | 57 | F | W* | IgG kappa                          | Red or pink plaques with telangiectasias on the face, trunk, and extremities. |      |                                          |    |    |    |  |  |
| Butterfield et al. <sup>14</sup> , 1994 | 47 | F | W  | Polyclonal, lymphoma               | Yellow or orange indurated nodules in a periorbital distribution.             |      | Lymphoreticular system and parotid gland | NL |    |    |  |  |

|                                       |    |   |   |                             |                                                                                                                                  |      |                        |    |    |     |  |
|---------------------------------------|----|---|---|-----------------------------|----------------------------------------------------------------------------------------------------------------------------------|------|------------------------|----|----|-----|--|
| Carabelli et al. <sup>15</sup> , 1997 | 70 | F |   | IgG lambda, MM              | Yellow or orange indurated ulcerated papules in a periorbital distribution and on the trunk and extremities.                     |      |                        |    |    | Yes |  |
| Chandra et al. <sup>16</sup> , 2002   | 32 | F |   |                             | Red or pink atrophic plaque with telangiectasias on the extremities.                                                             |      |                        | NL | NL | No  |  |
| Chang et al. <sup>17</sup> , 2003     | 82 | F | A |                             | Brown single nodule with telangiectasia on the extremities.                                                                      | None |                        | NL | NL | No  |  |
| Char et al. <sup>18</sup> , 1987      | 63 | F |   | Unspecified paraproteinemia | Purple nodules in a periorbital distribution and on the extremities.                                                             |      |                        |    | L  | Yes |  |
| Chave et al. <sup>19</sup> , 2001     | 66 | F |   | IgG kappa                   | Yellow or orange plaques in a periorbital distribution and on the trunk.                                                         |      |                        | NL | NL | No  |  |
| Chave et al. <sup>20</sup> , 2001     | 75 | M |   | IgG lambda                  | Brown atrophic ulcerated plaques with telangiectasias on the trunk and extremities.                                              |      |                        | NL |    |     |  |
| Chen et al. <sup>21</sup> , 2011      | 68 | M |   | IgG kappa, leukemia         |                                                                                                                                  |      | Lymphoreticular system |    | NL |     |  |
| Codere et al. <sup>22</sup> , 1983    | 52 | M |   | IgG kappa                   | Yellow or orange plaques with telangiectasias in a periorbital distribution and on the trunk and extremities.                    |      |                        |    |    | Yes |  |
|                                       | 56 | F |   | IgG kappa                   | Plaques in a periorbital distribution and elsewhere on the face.                                                                 | None | Eye                    |    |    |     |  |
| Cornblath et al. <sup>23</sup> , 1992 | 45 | M |   | IgG kappa, leukemia         | Plaques on the face, trunk, and extremities.                                                                                     |      |                        |    |    |     |  |
|                                       | 64 | F |   | IgG kappa                   | Ulcerated plaques in a periorbital distribution and on the trunk and extremities.                                                |      | Eye                    |    |    | Yes |  |
|                                       | 59 | F |   | IgG lambda                  | Yellow or orange plaques in a periorbital distribution and elsewhere on the face.                                                |      |                        |    |    |     |  |
|                                       | 70 | F |   | IgG kappa                   | Plaques in a periorbital distribution and on the trunk and extremities.                                                          |      |                        |    |    |     |  |
| Criado et al. <sup>24</sup> , 2002    | 40 | F | W | IgG lambda                  | Yellow or orange atrophic ulcerated plaques with telangiectasias in a periorbital distribution and on the trunk and extremities. |      |                        |    | NL | No  |  |
| Criton et al. <sup>25</sup> , 1996    | 57 | F |   | Unspecified paraproteinemia | Brown plaques in a periorbital distribution and elsewhere on the face and the extremities.                                       |      |                        | NL |    |     |  |

|                                      |    |   |   |                                       |                                                                                     |          |     |    |    |    |     |  |
|--------------------------------------|----|---|---|---------------------------------------|-------------------------------------------------------------------------------------|----------|-----|----|----|----|-----|--|
| Dabiri et al. <sup>26</sup> , 2011   | 83 | M |   | IgG lambda                            | Red or pink plaques in a periorbital distribution and on the trunk and extremities. | Pruritus |     |    |    |    |     |  |
| Davies et al. <sup>27</sup> , 2017   | 50 | M |   | IgG kappa, lymphoma                   | Yellow or orange ulcerated plaques in a periorbital distribution.                   |          | Eye |    |    |    |     |  |
|                                      | 75 | F |   | Unspecified paraproteinemia           | Ulcerated plaques in a periorbital distribution.                                    |          | Eye |    |    |    |     |  |
|                                      | 24 | M |   |                                       | Plaque in a periorbital distribution.                                               |          | Eye |    |    |    |     |  |
|                                      | 73 | M |   |                                       | Plaque in a periorbital distribution.                                               |          | Eye |    |    |    |     |  |
| DeLuca et al. <sup>28</sup> , 2014   | 89 | F | W | IgG kappa                             | Yellow or orange ulcerated plaques on the trunk and extremities.                    |          |     |    |    |    |     |  |
| Dholaria et al. <sup>29</sup> , 2016 | 51 | M | W | IgG lambda, MM                        | Red or pink ulcerated plaques on the trunk and extremities.                         |          |     |    |    |    |     |  |
| Dilnawaz, <sup>30</sup> 2010         | 73 | F | W | IgG lambda                            | Red or pink atrophic plaques on the trunk and extremities.                          |          |     |    |    |    | Yes |  |
| Dupre et al. <sup>31</sup> , 1988    | 60 | F |   |                                       | Yellow or orange indurated plaques on the extremities.                              | None     |     | H  |    |    |     |  |
| Efebera et al. <sup>32</sup> , 2011  | 79 | M | W | IgG kappa, MM                         | Red or pink ulcerated plaques on the trunk and extremities.                         | Pain     |     |    |    |    |     |  |
| Elner et al. <sup>33</sup> , 2006    | 60 | M |   |                                       | Yellow or orange nodules in a periorbital distribution.                             |          | Eye |    |    |    |     |  |
|                                      | 54 | M |   | Lymphoma                              | Yellow or orange nodules in a periorbital distribution.                             |          | Eye |    |    |    |     |  |
|                                      | 73 | F |   | Unspecified paraproteinemia           | Yellow or orange nodules in a periorbital distribution.                             | Pain     | Eye |    |    |    |     |  |
|                                      | 41 | M |   | Unspecified paraproteinemia, lymphoma | Yellow or orange nodules in a periorbital distribution.                             |          | Eye |    |    |    |     |  |
| Esmaeli et al. <sup>34</sup> , 2017  | 47 | F |   | Polyclonal                            | Yellow or orange indurated plaques in a periorbital distribution and on the trunk.  |          |     | NL | NL |    |     |  |
| Ferrara et al. <sup>35</sup> , 2007  | 81 | F |   | IgG kappa                             | Yellow or orange indurated plaque on the extremities.                               |          |     |    |    |    |     |  |
| Finelli et al. <sup>36</sup> , 1987  | 50 | F | W | IgG kappa                             | Yellow or orange ulcerated plaques on the extremities.                              |          |     | NL | NL | No |     |  |
| Fink et al. <sup>37</sup> , 2018     | 75 | M | W | Lymphoma                              | Brown plaques in a periorbital distribution and on the trunk.                       | Pain     |     |    |    |    |     |  |
| Flann et al. <sup>38</sup> , 2006    | 58 | M |   | IgG kappa                             | Purple nodules on the face, trunk, and extremities.                                 |          |     |    |    |    |     |  |

|                                      |    |   |   |                                |                                                                                              |          |                        |    |    |     |  |
|--------------------------------------|----|---|---|--------------------------------|----------------------------------------------------------------------------------------------|----------|------------------------|----|----|-----|--|
|                                      | 52 | M |   |                                | Red or pink plaques on the face, trunk, and extremities.                                     |          |                        |    |    |     |  |
|                                      | 68 | F |   | IgG kappa, leukemia            | Plaques on the face, trunk, and extremities.                                                 | Pruritus |                        | H  |    |     |  |
|                                      | 86 | M |   | IgG kappa                      | Purple ulcerated plaques on the trunk and extremities.                                       |          |                        |    |    |     |  |
| Fortson et al. <sup>39</sup> , 1990  | 78 | M | W | IgA                            | Yellow or orange papules on the face and trunk.                                              | Pain     | Gastrointestinal tract | NL |    | No  |  |
| Fu et al. <sup>40</sup> , 2011       | 73 | F | A | IgG kappa, lung adenocarcinoma | Yellow or orange nodules on the trunk and extremities.                                       | None     |                        |    |    |     |  |
| Furner et al. <sup>41</sup> , 1989   | 63 | M |   | IgG kappa                      | Brown atrophic, ulcerated papules on the face, trunk, and extremities.                       |          |                        |    |    |     |  |
| Gacto et al. <sup>42</sup> , 2009    | 50 | F |   | IgG kappa                      | Yellow or orange plaques in a periorbital distribution and on the trunk.                     | Pruritus |                        |    |    |     |  |
|                                      | 55 | F |   |                                | Yellow or orange nodules in a periorbital distribution.                                      | None     |                        |    |    |     |  |
| Georgiou et al. <sup>43</sup> , 1999 | 82 | M | W |                                | Yellow or orange atrophic plaques with telangiectasias on the trunk.                         | None     |                        | NL |    |     |  |
| Gergen et al. <sup>44</sup> , 2011   | 56 | M |   | IgG kappa, lymphoma            | Yellow or orange nodules with telangiectasias on the trunk and extremities.                  | None     |                        |    |    |     |  |
| Ghani et al. <sup>45</sup> , 2013    | 46 | F |   | IgG kappa                      | Yellow or orange papules in a periorbital distribution.                                      |          |                        |    |    |     |  |
| Ghiasi et al. <sup>46</sup> , 2012   | 58 | M |   | Polyclonal                     | Red or pink ulcerated plaques on the trunk and the extremities.                              | Pain     |                        | NL |    |     |  |
| Girisha et al. <sup>47</sup> , 2012  | 61 | F |   |                                | Yellow or orange plaques in a periorbital distribution.                                      | Pruritus |                        | NL |    |     |  |
| Goede et al. <sup>48</sup> , 2007    | 26 | M |   | IgG kappa                      | Yellow or orange plaques in a periorbital distribution and on the trunk.                     |          |                        |    |    |     |  |
| Gonzales et al. <sup>49</sup> , 2017 | 36 | F | W | IgG kappa                      | Yellow or orange indurated ulcerated plaques in a periorbital distribution and on the trunk. |          | Eye                    |    |    |     |  |
| Goyal et al. <sup>50</sup> , 2018    | 42 | F | A | IgG kappa                      | Purple plaques in a periorbital distribution.                                                | Pain     |                        |    | L  | Yes |  |
| Gun et al. <sup>51</sup> , 2004      | 44 | F |   |                                | Red or pink plaques with telangiectasias within a scar.                                      | Pain     |                        |    | NL | No  |  |

|                                        |    |   |   |                                       |                                                                                                                                           |      |                                  |    |    |    |  |
|----------------------------------------|----|---|---|---------------------------------------|-------------------------------------------------------------------------------------------------------------------------------------------|------|----------------------------------|----|----|----|--|
| Hallerman et al. <sup>52</sup> , 2010  | 55 | F | W | IgG lambda                            | Red or pink indurated plaques on the face, trunk, and extremities.                                                                        |      |                                  |    |    |    |  |
|                                        | 69 | F | W | IgG kappa, MM                         | Red or pink plaques on the face, trunk, and extremities.                                                                                  | None |                                  |    |    |    |  |
| Hamilton et al. <sup>53</sup> , 2014   | 63 | F | W | IgG lambda, leukemia                  | Brown plaques on the face and trunk.                                                                                                      |      |                                  |    |    |    |  |
| Hashemi et al. <sup>54</sup> , 2012    | 58 | F | W | IgG kappa                             | Purple nodules on the trunk.                                                                                                              |      | Eye                              |    |    |    |  |
| Hauser et al. <sup>55</sup> , 1991     | 57 | M |   | IgG kappa                             | Yellow or orange plaques on the face, trunk, and extremities.                                                                             |      |                                  |    |    |    |  |
| Herd et al. <sup>56</sup> , 2018       | 40 | M |   | Unspecified paraproteinemia, lymphoma | Yellow or orange plaques with telangiectasias on the trunk and extremities, including within a scar.                                      |      |                                  |    |    |    |  |
| Holden et al. <sup>57</sup> , 1986     | 78 | F |   | IgG kappa                             | Yellow or orange atrophic plaques with telangiectasias in a periorbital distribution and on the trunk.                                    |      |                                  | NL | NL | No |  |
|                                        | 64 | F |   | IgG kappa                             | Purple atrophic ulcerated plaques with telangiectasias in a periorbital distribution and elsewhere on the face and trunk.                 |      |                                  | NL |    | No |  |
|                                        | 55 | F |   | IgG kappa                             | Yellow or orange atrophic ulcerated plaques with telangiectasias in a periorbital distribution and on the trunk, including within a scar. |      |                                  | NL |    | No |  |
|                                        | 85 | F |   | IgG kappa                             | Yellow or orange atrophic ulcerated nodules in a periorbital distribution and on the extremities.                                         | Pain |                                  | N  |    | No |  |
| Hunter et al. <sup>58</sup> , 1985     | 39 | F | W | IgG kappa                             | Yellow or orange ulcerated nodules with telangiectasias in a periorbital distribution and elsewhere on the face and extremities.          |      | Gastrointestinal tract and heart |    |    |    |  |
| Inthasotti et al. <sup>59</sup> , 2011 | 64 | F |   | IgG lambda, MM                        | Yellow or orange atrophic ulcerated plaques in a periorbital distribution and on the extremities.                                         | None |                                  |    |    |    |  |
| Ito et al. <sup>60</sup> , 2008        | 86 | F |   | IgG lambda                            | Brown atrophic plaques on the extremities.                                                                                                |      |                                  |    | NL |    |  |
| Jeziorska et al. <sup>61</sup> , 2003  | 65 | F |   | IgG kappa                             | Yellow or orange plaques in a periorbital distribution and on the trunk.                                                                  |      |                                  |    |    |    |  |

|                                        |    |   |   |                |                                                                                                             |          |     |    |    |    |  |
|----------------------------------------|----|---|---|----------------|-------------------------------------------------------------------------------------------------------------|----------|-----|----|----|----|--|
|                                        | 55 | F |   | IgG kappa      | Yellow or orange plaques in a periorbital distribution and elsewhere on the face and trunk.                 | Pain     |     | NL |    |    |  |
| Johnston et al. <sup>62</sup> , 1997   | 69 | F |   | IgG kappa      | Red or pink atrophic plaques with telangiectasias on the trunk and extremities.                             | Pruritus |     |    | L  | No |  |
| Kadokia et al. <sup>63</sup> , 2012    | 65 | F |   |                | Brown atrophic nodules with telangiectasias in a periorbital distribution.                                  | None     |     |    |    |    |  |
| Kawakami et al. <sup>64</sup> , 2011   | 93 | F | A | IgG lambda     | Yellow or orange plaque on the extremities.                                                                 | Pain     |     |    |    |    |  |
| Keorochana et al. <sup>65</sup> , 2017 | 53 | M | A | Polyclonal     |                                                                                                             |          | Eye | H  |    |    |  |
| Khan et al. <sup>66</sup> , 2009       | 54 | F | W | IgG lambda     | Yellow or orange plaques in a periorbital distribution.                                                     |          |     |    |    |    |  |
| Khan et al. <sup>67</sup> , 2012       | 82 | F | W |                | Red or pink nodule on the trunk.                                                                            | None     |     |    | NL | No |  |
| Koch et al. <sup>68</sup> , 2008       | 77 | F |   | IgG kappa      | Yellow or orange ulcerated plaques on the trunk and extremities.                                            | Pain     |     | NL |    |    |  |
| Koch et al. <sup>69</sup> , 2013       | 79 | F |   | IgG kappa      | Yellow or orange plaques on the trunk and extremities, including within a scar.                             | None     |     |    |    |    |  |
| Kossard et al. <sup>70</sup> , 2000    | 88 | M |   | IgG kappa      | Yellow or orange ulcerated nodules on the face, trunk, and extremities.                                     |          |     |    |    |    |  |
| Kovalyshyn et al. <sup>71</sup> , 2009 | 82 | F |   | IgG kappa      | Purple plaques in a periorbital distribution and on the trunk and extremities.                              |          |     |    |    |    |  |
| Kunikata et al. <sup>72</sup> , 2006   | 65 | F | A |                | Yellow or orange nodule on the face.                                                                        |          |     |    | H  | No |  |
| Lam et al. <sup>73</sup> , 2013        | 78 | M |   | IgG kappa, MM  | Yellow or orange plaques in a periorbital distribution.                                                     | None     |     |    |    |    |  |
| Langlois et al. <sup>74</sup> , 2006   | 75 | F | W | IgG lambda, MM | Yellow or orange plaques in a periorbital distribution and on the trunk and extremities.                    |          |     |    | L  |    |  |
| Le et al. <sup>75</sup> , 1997         | 67 | M | W | IgG kappa      | Yellow or orange atrophic ulcerated plaques in a periorbital distribution and on the trunk and extremities. | Pain     |     |    | NL |    |  |

|                                                |    |   |   |               |                                                                                                     |      |  |    |    |     |  |
|------------------------------------------------|----|---|---|---------------|-----------------------------------------------------------------------------------------------------|------|--|----|----|-----|--|
| Lebey et al. <sup>76,77</sup> , 1997**         | 88 | F | W | IgG kappa     | Purple plaques with telangiectasias in a periorbital distribution and on the trunk and extremities. | None |  |    | L  |     |  |
| Lee et al. <sup>78</sup> , 2017                | 44 | M |   | IgG kappa     | Brown plaques on the extremities.                                                                   |      |  |    |    |     |  |
| Li et al. <sup>79</sup> , 2014                 | 50 | F |   |               | Yellow or orange plaques with telangiectasias in a periorbital distribution.                        |      |  | NL | NL | No  |  |
| Liszewski et al. <sup>80</sup> , 2014          | 39 | F | W |               | Red or pink plaques on the face and trunk.                                                          |      |  |    |    |     |  |
|                                                | 60 | F |   | IgG kappa     | Red or pink plaques in a periorbital distribution and on the trunk and extremities.                 |      |  |    |    |     |  |
| Luck et al. <sup>81</sup> , 1992               | 42 | F |   | IgG kappa     | Yellow or orange plaques in a periorbital distribution.                                             |      |  |    |    |     |  |
| Lukacs et al. <sup>82</sup> , 2017             | 74 | F | W | IgM           | Red or pink ulcerated plaques in a periorbital distribution and on the extremities.                 |      |  |    |    |     |  |
| Macfarlane et al. <sup>83</sup> , 1985         | 66 | M |   | IgG kappa     | Purple nodules in a periorbital distribution and on the trunk and extremities.                      | Pain |  | NL | L  | No  |  |
| McGregor et al. <sup>84</sup> , 1993           | 73 | M | W | IgG kappa     | Red or pink Ulcerated nodules on the trunk and extremities.                                         |      |  |    |    |     |  |
|                                                | 76 | M |   | IgG lambda    | Ulcerated plaques on the trunk and extremities.                                                     | None |  |    |    |     |  |
| Machado et al. <sup>85</sup> , 2001            | 51 | F | W | IgG lambda    | Purple nodules with telangiectasias in a periorbital distribution and on the trunk and extremities. | None |  |    | L  | Yes |  |
| Mahendran et al. <sup>86</sup> , 2018          | 78 | F | W | IgG kappa, MM | Yellow or orange plaques in a periorbital distribution.                                             |      |  |    | L  |     |  |
| Martinez Fernandez et al. <sup>87</sup> , 2004 | 73 | M |   | IgG kappa, MM | Brown plaques in a periorbital distribution.                                                        |      |  | NL | L  | No  |  |
| Mathias et al. <sup>88</sup> , 2011            | 61 | F |   |               | Yellow or orange papules in a periorbital distribution.                                             | None |  |    |    |     |  |
| Matsuura et al. <sup>89</sup> , 1999           | 76 | M |   | IgG lambda    | Yellow or orange ulcerated nodules in a periorbital distribution and on the extremities.            |      |  | NL |    |     |  |

|                                          |    |   |   |                                       |                                                                                                    |                   |                 |  |    |     |  |
|------------------------------------------|----|---|---|---------------------------------------|----------------------------------------------------------------------------------------------------|-------------------|-----------------|--|----|-----|--|
| Meyer et al. <sup>90</sup> , 2005        | 53 | F |   | IgG kappa                             | Yellow or orange indurated plaques in a periorbital distribution.                                  | Pain              | Eye             |  |    |     |  |
| Minocha et al. <sup>91</sup> , 2017      | 57 | M |   | IgG kappa                             | Yellow or orange papules in a periorbital distribution and on the trunk.                           |                   |                 |  | NL | No  |  |
|                                          | 63 | F |   | IgG lambda                            | Brown nodules in a periorbital distribution and on the trunk and extremities.                      |                   | Eye             |  |    |     |  |
| Miszkiel et al. <sup>92</sup> , 2000     | 52 | M |   |                                       | Yellow or orange plaques in a periorbital distribution.                                            |                   | Eye             |  |    |     |  |
| Mohsenin et al. <sup>93</sup> , 2012     | 53 | M |   | Unspecified paraproteinemia, lymphoma | Yellow or orange multiple lesions in a periorbital distribution.                                   | Pain              | Eye             |  |    |     |  |
| Muscardin et al. <sup>94</sup> , 2003    | 40 | M |   | Polyclonal                            | Brown papules on the trunk and extremities.                                                        |                   |                 |  |    |     |  |
| Naghshpour et al. <sup>95</sup> , 2011   | 52 | F |   | IgG lambda, leukemia                  | Yellow or orange nodules in a periorbital distribution and elsewhere on the face.                  | Pain              |                 |  |    |     |  |
| Nestle et al. <sup>96</sup> , 1999       | 77 | F |   | IgG lambda                            | Yellow or orange nodules in a periorbital distribution and on the trunk and extremities.           |                   |                 |  |    |     |  |
| Nishimura et al. <sup>97</sup> , 1992    | 67 | M |   | IgG kappa                             | Purple plaques in a periorbital distribution and on the trunk.                                     |                   |                 |  | L  |     |  |
| Nockowski et al. <sup>98</sup> , 2017    | 83 | F |   | IgG kappa                             | Yellow or orange ulcerated nodules in a periorbital distribution and on the trunk.                 |                   |                 |  |    |     |  |
| Novak et al. <sup>99</sup> , 1992        | 73 | F |   | IgG kappa                             | Ulcerated plaques on the face, trunk, and extremities.                                             |                   | Heart and liver |  |    |     |  |
| Oestreicher et al. <sup>100</sup> , 2010 | 95 | F |   |                                       | Yellow or orange ulcerated plaques in a periorbital distribution.                                  |                   | Eye             |  |    |     |  |
| Olson et al. <sup>101</sup> , 2018       | 44 | F | W | IgG kappa, MM                         | Yellow or orange plaques in a periorbital distribution.                                            | Pain              |                 |  | L  | Yes |  |
| Omarjee et al. <sup>102</sup> , 2018     | 64 | F |   | IgM, leukemia                         | Yellow or orange nodules on the extremities.                                                       |                   |                 |  |    |     |  |
| Oumeish et al. <sup>103</sup> , 2006     | 56 | F |   | IgG kappa, lymphoma                   | Yellow or orange ulcerated plaques in a periorbital distribution and on the trunk and extremities. | Pain and pruritus |                 |  |    |     |  |

|                                         |    |   |   |                                       |                                                                                                          |          |                |    |    |     |  |  |
|-----------------------------------------|----|---|---|---------------------------------------|----------------------------------------------------------------------------------------------------------|----------|----------------|----|----|-----|--|--|
| Pedrosa et al. <sup>104</sup> , 2015    | 44 | F | W | IgG kappa                             | Purple indurated plaques in a periorbital distribution and on the extremities.                           | None     |                |    |    |     |  |  |
| Peyman et al. <sup>105</sup> , 2012     | 57 | M |   | IgG lambda                            | Yellow or orange atrophic plaques on the trunk and extremities.                                          |          | Eye            |    |    |     |  |  |
| Plotnick et al. <sup>106</sup> , 1991   | 40 | F | W | IgG kappa, MM                         | Nodules in a periorbital distribution.                                                                   | None     |                | NL |    |     |  |  |
| Randell et al. <sup>107</sup> , 1999    | 51 | F |   | IgG lambda                            | Yellow or orange nodules in a periorbital distribution.                                                  |          |                | NL |    |     |  |  |
| Rashid et al. <sup>108</sup> , 2009     | 70 | F |   | Unspecified paraproteinemia           | Yellow or orange plaques in a periorbital distribution.                                                  | Pruritus |                |    |    |     |  |  |
| Rayner et al. <sup>109</sup> , 2008     | 76 | F | W | IgG kappa                             | Nodule on the trunk and extremities, including within a scar.                                            |          | Liver and lung |    |    |     |  |  |
| Reddy et al. <sup>110</sup> , 2010      | 73 | F |   | Unspecified paraproteinemia, MM       | Yellow or orange plaques in a periorbital distribution.                                                  |          | Eye            |    |    |     |  |  |
| Reeder et al. <sup>111</sup> , 1991     | 20 | F |   | Polyclonal, lymphoma                  | Atrophic plaques with telangiectasias on the extremities.                                                |          |                |    |    | No  |  |  |
| Rose et al. <sup>112</sup> , 1991       | 22 | M | W | IgG kappa                             | Yellow or orange plaques in a periorbital distribution.                                                  | None     | Eye            | NL | L  |     |  |  |
|                                         | 50 | M | W | Unspecified paraproteinemia, lymphoma | Yellow or orange plaques in a periorbital distribution.                                                  |          | Eye            |    |    |     |  |  |
| Rose et al. <sup>113</sup> , 2012       | 63 | F |   | Unspecified paraproteinemia           | Yellow or orange plaques with telangiectasias on the face, trunk, and extremities.                       |          |                |    |    |     |  |  |
| Rubinstein et al. <sup>114</sup> , 2013 | 68 | F |   | IgG kappa                             | Yellow or orange nodules on the face, trunk, and extremities.                                            |          |                |    |    |     |  |  |
| Russo et al. <sup>115</sup> , 2002      | 68 | M |   | IgG lambda                            | Yellow or orange indurated plaques on the trunk and extremities.                                         |          |                |    | NL | Yes |  |  |
| Ryan et al. <sup>116</sup> , 2012       | 55 | M |   | IgG lambda, leukemia                  | Yellow or orange indurated plaques on the trunk and extremities.                                         |          |                |    |    |     |  |  |
| Saeki et al. <sup>117</sup> , 2007      | 57 | F | A | IgG kappa                             | Red or pink ulcerated nodules with telangiectasias in a periorbital distribution and on the extremities. |          |                |    | L  | No  |  |  |
| Sagiv et al. <sup>118</sup> , 2018      | 61 | M |   |                                       | Yellow or orange plaques in a periorbital distribution.                                                  |          |                |    |    |     |  |  |

|                                           |    |   |   |                           |                                                                                                 |          |               |    |    |    |                |
|-------------------------------------------|----|---|---|---------------------------|-------------------------------------------------------------------------------------------------|----------|---------------|----|----|----|----------------|
| Santosaputri et al. <sup>119</sup> , 2014 | 51 | F |   | IgG kappa                 | Yellow or orange and purple plaques and nodules on the face and trunk, including within a scar. |          | Liver         |    |    |    |                |
| Schaudig et al. <sup>120</sup> , 2004     | 67 | F | W | IgG kappa                 | Red or pink ulcerated plaques on the face, trunk, and extremities.                              |          |               |    |    |    |                |
| Scupham et al. <sup>121</sup> , 1989      | 57 | F |   | IgG kappa                 | Yellow or orange plaques in a periorbital distribution and on the extremities.                  | Pain     |               |    | L  |    |                |
| Seastrom et al. <sup>122</sup> , 2014     | 76 | M |   |                           | Yellow or orange indurated plaques in a periorbital distribution.                               |          |               | NL |    |    |                |
| Sfeir et al. <sup>123</sup> , 2017        | 83 | F |   | IgG lambda, breast cancer | Yellow or orange plaques on the face, trunk, and extremities.                                   |          |               |    |    |    | L <sup>^</sup> |
| Shah et al. <sup>124</sup> , 2004         | 52 | M |   |                           | Nodules in a periorbital distribution and on the trunk and extremities.                         | None     | Brain and eye |    |    |    |                |
| Silapunt et al. <sup>125</sup> , 2010     | 81 | M | W | IgG kappa                 | Brown nodules in a periorbital distribution and on the trunk and extremities.                   | Pruritus |               | NL |    |    |                |
| Singh et al. <sup>126</sup> , 2010        | 67 | M | W | IgG kappa                 | Plaques in a periorbital distribution.                                                          |          |               |    |    |    |                |
|                                           | 62 | F | W |                           |                                                                                                 |          |               |    |    |    |                |
| Smith et al. <sup>127</sup> , 2006        | 61 | F |   | IgG kappa                 | Yellow or orange nodule with telangiectasias on the trunk.                                      | None     |               |    |    |    |                |
| Stork et al. <sup>128</sup> , 2000        | 60 | F | W |                           | Brown plaque on the extremities.                                                                | None     |               | L  | NL | No |                |
| Sutton et al. <sup>129</sup> , 2013       | 71 | M |   | IgG lambda                | Yellow or orange ulcerated plaques on the face, trunk, and extremities.                         |          |               |    | L  |    |                |
| Szalat et al. <sup>130</sup> , 2011       | 67 | F |   | IgG kappa, MM             |                                                                                                 |          |               |    |    | No |                |
|                                           | 65 | F |   | IgG kappa, MM             |                                                                                                 |          |               |    |    | No |                |
|                                           | 63 | M |   | IgG lambda                |                                                                                                 |          |               |    |    | No |                |
|                                           | 71 | F |   | IgG lambda                |                                                                                                 |          |               |    |    |    |                |
|                                           | 72 | F |   | IgG kappa                 |                                                                                                 |          |               |    | L  | No |                |
|                                           | 48 | M |   | IgG kappa, lymphoma       |                                                                                                 |          |               |    | L  |    |                |
|                                           | 53 | M |   | IgG kappa                 |                                                                                                 |          |               |    |    |    |                |
|                                           | 65 | F |   | IgG kappa, MM             |                                                                                                 |          |               |    |    | No |                |
|                                           | 78 | F |   | IgG kappa                 |                                                                                                 |          |               |    |    |    |                |
|                                           | 65 | F |   | IgG lambda, MM            |                                                                                                 |          |               |    |    |    |                |

|                                        |    |   |   |                        |                                                                                                                             |                   |                                  |    |    |     |  |
|----------------------------------------|----|---|---|------------------------|-----------------------------------------------------------------------------------------------------------------------------|-------------------|----------------------------------|----|----|-----|--|
|                                        | 68 | F |   | IgG kappa              |                                                                                                                             |                   |                                  |    |    |     |  |
| Szalat et al. <sup>131</sup> , 2014    | 68 | M |   | IgG lambda             | Multiple lesions on the face, trunk, and extremities.                                                                       |                   |                                  | L  | L  |     |  |
|                                        | 69 | F |   | IgG kappa, MM          | Multiple lesions on the face, trunk, and extremities.                                                                       |                   |                                  | NL | L  |     |  |
|                                        | 65 | F |   | IgG kappa              | Multiple lesions in a periorbital distribution.                                                                             |                   |                                  |    | L  |     |  |
|                                        | 68 | F |   | IgG kappa, MM          | Multiple lesions on the trunk.                                                                                              |                   |                                  | L  | L  |     |  |
|                                        | 65 | F |   | IgG lambda             | Multiple lesions on the trunk.                                                                                              |                   |                                  | L  | L  |     |  |
|                                        | 60 | M |   | IgG lambda             | Multiple lesions in a periorbital distribution.                                                                             |                   |                                  | NL | L  |     |  |
|                                        | 73 | F |   | IgG lambda, MM         | Multiple lesions in a periorbital distribution.                                                                             |                   |                                  | L  |    |     |  |
|                                        | 83 | F |   | IgG kappa, MM          | Multiple lesions on the face, trunk, and extremities.                                                                       |                   |                                  | L  |    |     |  |
| Torabian et al. <sup>132</sup> , 2006  | 56 | M |   | IgG lambda             | Red or pink atrophic ulcerated plaques with telangiectasias in a periorbital distribution and on the trunk and extremities. | Pruritus          |                                  |    | L  |     |  |
| Tucker et al. <sup>133</sup> , 1997    | 43 | F |   |                        | Yellow or orange nodules in a periorbital distribution.                                                                     |                   | Eye                              |    |    |     |  |
| Umbert et al. <sup>134</sup> , 1995    | 61 | F |   | IgG kappa              | Yellow or orange plaques in a periorbital distribution and elsewhere on the face and trunk.                                 |                   | Heart and lymphoreticular system |    |    | Yes |  |
| Valentine et al. <sup>135</sup> , 1990 | 64 | M | W | IgA, MM, rectal cancer | Nodule in a periorbital distribution.                                                                                       | None              |                                  |    |    |     |  |
| Venencie et al. <sup>136</sup> , 1987  | 46 | M |   | IgG kappa, MM          | Yellow or orange nodules in a periorbital distribution and on the trunk and extremities.                                    |                   |                                  |    | NL |     |  |
| Venencie et al. <sup>137</sup> , 1995  | 65 | F | W | IgG kappa              | Yellow or orange nodules in a periorbital distribution and on the trunk and extremities.                                    |                   |                                  |    |    |     |  |
| Vieira et al. <sup>138</sup> , 2005    | 68 | F |   | IgG lambda, lymphoma   | Brown plaques in a periorbital distribution and on the trunk.                                                               |                   |                                  |    |    |     |  |
| Vignon et al. <sup>139</sup> , 2017    | 65 | F |   | IgG kappa, MM          | Nodules on the trunk.                                                                                                       | Pain and pruritus |                                  |    |    |     |  |
|                                        | 66 | M |   | IgG kappa              |                                                                                                                             |                   | Eye                              |    |    |     |  |

|                                             |    |   |   |                             |                                                                                   |          |                                 |    |   |    |  |
|---------------------------------------------|----|---|---|-----------------------------|-----------------------------------------------------------------------------------|----------|---------------------------------|----|---|----|--|
| Vu et al. <sup>140</sup> , 2017             | 55 | M | W | IgG kappa                   | Yellow or orange ulcerated nodule in a periorbital distribution and on the trunk. |          | Eye                             |    | L | No |  |
| Wee et al. <sup>141</sup> , 2005            | 67 | M | W | Unspecified paraproteinemia | Brown papules on the face and extremities.                                        |          |                                 |    |   |    |  |
| Wei et al. <sup>142</sup> , 2015            | 69 | M | A |                             | Brown atrophic plaques with telangiectasias on the extremities.                   |          |                                 | NL |   | No |  |
| Wells et al. <sup>143</sup> , 2004          | 53 | F |   | IgG kappa                   | Yellow or orange plaques in a periorbital distribution and on the extremities.    | Pruritus |                                 |    |   |    |  |
| Winkelmann et al. <sup>144</sup> , 1997     | 47 | M |   | IgG lambda                  | Yellow or orange plaques in a periorbital distribution and on the trunk.          |          |                                 |    |   |    |  |
|                                             | 64 | M |   | IgG kappa                   | Red or pink atrophic plaques and nodules on the trunk and extremities.            |          | Gastrointestinal tract and lung | L  | L |    |  |
|                                             | 39 | F |   | Unspecified paraproteinemia | Yellow or orange plaque on the extremities.                                       |          | Heart and lung                  |    |   |    |  |
| Wolz et al. <sup>145</sup> , 2012           | 64 | M |   | IgM kappa                   | Red or pink ulcerated papules on the extremities.                                 | Pain     |                                 |    | L |    |  |
| Wruhs et al. <sup>146</sup> , 2016          | 82 | F |   | IgG lambda                  | Red or pink atrophic plaques on the trunk.                                        |          |                                 |    |   |    |  |
| Yang et al. <sup>147</sup> , 2010           | 46 | M | A | IgG kappa                   | Red or pink ulcerated papules on the trunk and extremities.                       |          |                                 | NL | L | No |  |
| Yasukawa et al. <sup>148</sup> , 2005       | 69 | F | A | IgG kappa                   | Yellow or orange atrophic plaques on the trunk and extremities.                   |          | Muscle                          |    |   |    |  |
| Yoon et al. <sup>149</sup> , 2007           | 66 | F |   | IgG kappa, MM               | Brown indurated nodules on the extremities.                                       | None     |                                 |    |   |    |  |
| Zainal et al. <sup>150</sup> , 2010         | 48 | M | A |                             |                                                                                   |          | Parotid gland                   |    |   |    |  |
| Zelger et al. <sup>151,152</sup> , *** 2007 | 55 | M |   | IgG lambda                  | Atrophic plaques on the face, trunk, and extremities.                             |          |                                 |    |   |    |  |
|                                             | 37 | F |   | IgG kappa                   | Yellow or orange plaques on the face, trunk, and extremities.                     |          |                                 |    |   |    |  |
|                                             | 70 | M |   |                             | Plaques on the face and trunk.                                                    |          |                                 |    |   |    |  |
|                                             | 42 | F |   |                             | Plaques on the face.                                                              |          |                                 |    |   |    |  |
|                                             | 49 | F |   | IgG kappa                   | Plaques in a periorbital distribution and elsewhere on the face and trunk.        |          |                                 |    |   |    |  |
|                                             | 63 | F |   | IgG kappa                   | Plaques in a periorbital distribution.                                            |          |                                 |    |   |    |  |

|                                     |    |   |  |            |                                                                                         |  |  |  |  |  |  |
|-------------------------------------|----|---|--|------------|-----------------------------------------------------------------------------------------|--|--|--|--|--|--|
|                                     | 56 | F |  | IgM        | Plaques in a periorbital distribution and on the trunk and extremities.                 |  |  |  |  |  |  |
| Ziemer et al. <sup>153</sup> , 2012 | 55 | F |  | IgG lambda | Brown indurated plaques in a periorbital distribution and on the trunk and extremities. |  |  |  |  |  |  |

\* Patient identified as Hispanic or Latino ethnicity.

^ Patient had a high 1,25-dihydroxyvitamin D level

\*\*The associated reference was accidentally duplicated.

\*\*\*These references refer to the same patient. Reference 151 is included in the article; reference 152 is omitted.

A, Asian; C, complement; cryos, cryoglobulins; F, female; H, high; HDL-C, high-density lipoprotein cholesterol; Ig, immunoglobulin; L, low; M, male; MM, multiple myeloma; NL, normal; VD, 25-hydroxyvitamin D; W, White

## eReferences

1. Al-Bermani A, Figueiredo F, Speight EL, Jackson GH, Pandit R. Necrobiotic xanthogranuloma masquerading as posterior scleritis. *Eye (London, England)*. 2009;23(1):239-240.
2. Al-Niaimi FA, Dawn G, Cox NH. Necrobiotic xanthogranuloma without paraproteinaemia: marked improvement with psoralen ultraviolet A treatment. *Clinical and experimental dermatology*. 2010;35(3):275-277.
3. AlGain M, Szalat R, Vignon-Pennamen MD, et al. A rare case of disseminated skin and mucosal necrobiotic xanthogranuloma and xanthoma. *Journal of the European Academy of Dermatology and Venereology : JEADV*. 2017;31(1):e3-e5.
4. Ali FR, Green R, Chularojanamontri L, Young HS, Motta L. Recurrent posterior scleritis and a 'sebaceous cyst': Extrafacial necrobiotic xanthogranuloma. *British Journal of Dermatology*. 2012;167:18-19.
5. Amer R, Pe'er J, Pappo O, Dotan S. Necrobiotic xanthogranuloma associated with choroidal infiltration and syncytial giant cell hepatitis. *Journal of neuro-ophthalmology : the official journal of the North American Neuro-Ophthalmology Society*. 2005;25(3):189-192.
6. Bain EE, 3rd, Meehan SA, Hale EK. Solitary necrobiotic xanthogranuloma of an upper extremity in association with multiple myeloma. *Journal of drugs in dermatology : JDD*. 2014;13(5):598-600.
7. Balagula Y, Straus DJ, Pulitzer MP, Lacouture ME. Necrobiotic xanthogranuloma associated with immunoglobulin m paraproteinemia in a patient with Waldenstrom macroglobulinemia. *Journal of clinical oncology : official journal of the American Society of Clinical Oncology*. 2011;29(11):e305-307.
8. Barzilai A, Trau H, Shpiro D, Yorav S. Necrobiotic xanthogranuloma with paraproteinemia. *Cutis*. 1996;57(5):320-322.
9. Betts CM, Pasquinelli G, Costa AM, Fanti PA, Misciali C, Varotti C. Necrobiotic xanthogranuloma without periorbital involvement: an ultrastructural investigation. *Ultrastructural pathology*. 2001;25(6):437-444.
10. Bhari N, Chiramel MJ, VEDI KK, et al. Necrobiotic xanthogranuloma with multiple myeloma. *Clinical and experimental dermatology*. 2015;40(7):811-814.
11. Bortolani A, Barisoni D, Bontempini L. Necrobiotic xanthogranuloma of the eyelids with paraproteinemia. *European Journal of Plastic Surgery*. 1999;22(1):36-39.
12. Bullock JD, Bartley GB, Campbell RJ, Yanes B, Connelly PJ, Funkhouser JW. Necrobiotic xanthogranuloma with paraproteinemia: case report and a pathogenetic theory. *Transactions of the American Ophthalmological Society*. 1986;84:342-354.
13. Burdick AE, Sanchez J, Elgart GW. Necrobiotic xanthogranuloma associated with a benign monoclonal gammopathy. *Cutis*. 2003;72(1):47-50.
14. Butterfield JH, Bartley GB. Atypical periorbital xanthogranulomas associated with systemic benign lymphoepithelial lesions. *Ophthalmic plastic and reconstructive surgery*. 1994;10(4):287-292.
15. Carabelli A, Cecca E, Crovetto G, et al. IgG lambda multiple myeloma and diffuse necrobiotic xanthogranuloma association: A case report. *European Journal of Dermatology*. 1997;7(7):519-521.

16. Chandra S, Finklestein E, Gill D. Necrobiotic xanthogranuloma occurring within linear morphoea. *The Australasian journal of dermatology*. 2002;43(1):52-54.
17. Chang SE, Lee WS, Lee MW, et al. A case of necrobiotic xanthogranuloma without paraproteinemia presenting as a solitary tumor on the thigh. *International journal of dermatology*. 2003;42(6):470-472.
18. Char DH, LeBoit PE, Ljung BM, Wara W. Radiation therapy for ocular necrobiotic xanthogranuloma. *Archives of ophthalmology (Chicago, Ill : 1960)*. 1987;105(2):174-175.
19. Chave TA, Chowdhury MM, Holt PJ. Recalcitrant necrobiotic xanthogranuloma responding to pulsed high-dose oral dexamethasone plus maintenance therapy with oral prednisolone. *The British journal of dermatology*. 2001;144(1):158-161.
20. Chave TA, Hutchinson PE. Necrobiotic xanthogranuloma with two monoclonal paraproteins and no periorbital involvement at presentation. *Clinical and experimental dermatology*. 2001;26(6):493-496.
21. Chen KY, Leslie W, Mahon B, Venugopal P. A patient with necrobiotic xanthogranuloma presenting with an anterior mediastinal mass, plasma cell dyscrasia, and a lymphoproliferative disorder. *Clinical advances in hematology & oncology : H&O*. 2011;9(9):696-700.
22. Codere F, Lee RD, Anderson RL. Necrobiotic xanthogranuloma of the eyelid. *Archives of ophthalmology (Chicago, Ill : 1960)*. 1983;101(1):60-63.
23. Cornblath WT, Dotan SA, Trobe JD, Headington JT. Varied clinical spectrum of necrobiotic xanthogranuloma. *Ophthalmology*. 1992;99(1):103-107.
24. Criado PR, Vasconcellos C, Pegas JR, et al. Necrobiotic xanthogranuloma with lambda paraproteinemia: case report of successful treatment with melphalan and prednisone. *The Journal of dermatological treatment*. 2002;13(2):87-89.
25. Criton S, Asokan PU, Pailey S, Kuttappan SS, Rodriguez FP. Necrobiotic xanthogranuloma with paraproteinaemia. *Indian journal of dermatology, venereology and leprology*. 1996;62(6):383-385.
26. Dabiri S, Morales A, Ma L, et al. The frequency of dual TCR-PCR clonality in granulomatous disorders. *Journal of cutaneous pathology*. 2011;38(9):704-709.
27. Davies MJ, Whitehead K, Quagliotto G, Wood D, Patheja RS, Sullivan TJ. Adult Orbital and Adnexal Xanthogranulomatous Disease. *Asia-Pac J Ophthalmol*. 2017;6(5):435-443.
28. DeLuca IJ, Grossman ME. Vulvar necrobiotic xanthogranuloma. *Journal of the American Academy of Dermatology*. 2014;71(6):e247-248.
29. Dholaria BR, Cappel M, Roy V. Necrobiotic xanthogranuloma associated with monoclonal gammopathy: successful treatment with lenalidomide and dexamethasone. *Annals of hematology*. 2016;95(4):671-672.
30. Dilnawaz M. An unusual skin presentation of necrobiotic xanthogranuloma. *Journal of the College of Physicians and Surgeons--Pakistan : JCPSP*. 2010;20(4):274-275.
31. Dupre A, Viraben R. Necrobiotic xanthogranuloma: a case without paraproteinemia but with transepithelial elimination. *Journal of cutaneous pathology*. 1988;15(2):116-119.
32. Efebera Y, Blanchard E, Allam C, Han A, Lee S, Munshi N. Complete response to thalidomide and dexamethasone in a patient with necrobiotic xanthogranuloma associated with monoclonal gammopathy: a case report and review of the literature. *Clinical lymphoma, myeloma & leukemia*. 2011;11(3):298-302.

33. Elner VM, Mintz R, Demirci H, Hassan AS. Local corticosteroid treatment of eyelid and orbital xanthogranuloma. *Ophthalmic plastic and reconstructive surgery*. 2006;22(1):36-40.
34. Esmaeli N, Ghanadan A, Mansouri P, Ghaedi F. Necrobiotic xanthogranuloma after penicillin injection: A case report. *Iranian Journal of Dermatology*. 2017;20(1):26-28.
35. Ferrara G, Palombi N, Lipizzi A, Zalaudek I, Argenziano G. Nonnecrobiotic necrobiotic xanthogranuloma. *The American Journal of dermatopathology*. 2007;29(3):306-308.
36. Finelli LG, Ratz JL. Plasmapheresis, a treatment modality for necrobiotic xanthogranuloma. *Journal of the American Academy of Dermatology*. 1987;17(2 Pt 2):351-354.
37. Fink C, Schneiderbauer R, Hartschuh W, Enk A, Toberer F. Necrobiotic xanthogranuloma associated with chronic lymphocytic leukemia. *International journal of dermatology*. 2018;57(6):719-720.
38. Flann S, Wain EM, Halpern S, Andrews V, Whittaker S. Necrobiotic xanthogranuloma with paraproteinaemia. *Clinical and experimental dermatology*. 2006;31(2):248-251.
39. Fortson JS, Schroeter AL. Necrobiotic xanthogranuloma with IgA paraproteinemia and extracutaneous involvement. *The American Journal of dermatopathology*. 1990;12(6):579-584.
40. Fu T, Zwerner J, Kim J, Tang J. Subcutaneous nodules in an elderly patient. Necrobiotic xanthogranuloma. *Archives of dermatology*. 2011;147(10):1215-1220.
41. Furner BB, Stevens CS. Diffuse, ulcerating plaques and nodules. Necrobiotic xanthogranuloma (NXG) with paraproteinemia. *Archives of dermatology*. 1989;125(2):287-288, 290.
42. Gacto P, Barrera F, Pereyra JJ, Fernandez-Ortega P. Necrobiotic xanthogranuloma: efficacy of surgery in 2 patients. *Actas dermo-sifiliograficas*. 2009;100(6):499-502.
43. Georgiou S, Monastirli A, Kapranos N, Pasmatzis E, Sakkis T, Tsambaos D. Interferon alpha-2a monotherapy for necrobiotic xanthogranuloma. *Acta dermato-venereologica*. 1999;79(6):484-485.
44. Gergen N, Biebl K, Berg BC, Suwattee P. Slowly growing yellow nodules: challenge. Necrobiotic xanthogranuloma. *The American Journal of dermatopathology*. 2011;33(1):92-93, 103-104.
45. Ghani S, Al Ustwani O, Khalid B, et al. Periorbital necrobiotic xanthogranuloma treated successfully with novel multiple myeloma therapy. *Clinical advances in hematology & oncology : H&O*. 2013;11(10):678-680.
46. Ghiasi N, Alavi A, Coutts PM, Ghazarian D, Sibbald RG. Necrobiotic xanthogranuloma as an unusual cause of refractive chronic bilateral leg ulceration. *The international journal of lower extremity wounds*. 2012;11(4):293-295.
47. Girisha BS, Holla AP, Fernandes M, Noronha TM. Necrobiotic xanthogranuloma. *Journal of cutaneous and aesthetic surgery*. 2012;5(1):43-45.
48. Goede JS, Misselwitz B, Taverna C, et al. Necrobiotic xanthogranuloma successfully treated with autologous stem cell transplantation. *Annals of hematology*. 2007;86(4):303-306.
49. Gonzales JA, Haemel A, Gross AJ, Acharya NR. Management of Uveitis and Scleritis in Necrobiotic Xanthogranuloma. *Journal of ocular pharmacology and therapeutics : the official journal of the Association for Ocular Pharmacology and Therapeutics*. 2017;33(4):325-333.

50. Goyal A, O'Leary D, Vercellotti G, Miller D, McGlave P. Intravenous immunoglobulin for treatment of necrobiotic xanthogranuloma. *Dermatologic therapy*. 2018:e12744.
51. Gun D, Demircay Z, Demirkesen C. Necrobiotic xanthogranuloma in a burn scar. *International journal of dermatology*. 2004;43(4):293-295.
52. Hallermann C, Tittelbach J, Norgauer J, Ziemer M. Successful treatment of necrobiotic xanthogranuloma with intravenous immunoglobulin. *Archives of dermatology*. 2010;146(9):957-960.
53. Hamilton HK, Dover JS, Arndt KA. Successful treatment of disfiguring hemosiderin-containing hyperpigmentation with the Q-switched 650-nm wavelength laser. *JAMA dermatology*. 2014;150(11):1221-1222.
54. Hashemi P, Rashidi A, Chapas AM, Balfour EM. Necrobiotic xanthogranuloma of the extremities with paraproteinemia and without periorbital involvement at presentation. *Cutis*. 2012;89(1):41-44.
55. Hauser C, Schifferli J, Saurat JH. Complement consumption in a patient with necrobiotic xanthogranuloma and paraproteinemia. *Journal of the American Academy of Dermatology*. 1991;24(5 Pt 2):908-911.
56. Herd TJ, Fischer R, Christensen LC, Rajpara A. Irregular yellow-brown plaques on the trunk and thighs. *Cutis*. 2018;101(1):12;15.
57. Holden CA, Winkelmann RK, Wilson Jones E. Necrobiotic xanthogranuloma: a report of four cases. *The British journal of dermatology*. 1986;114(2):241-250.
58. Hunter L, Burry AF. Necrobiotic xanthogranuloma: a systemic disease with paraproteinemia. *Pathology*. 1985;17(3):533-536.
59. Inthasotti S, Wanitphakdeedecha R, Manonukul J. A 7-Year History of Necrobiotic Xanthogranuloma following Asymptomatic Multiple Myeloma: A Case Report. *Dermatology research and practice*. 2011;2011:927852.
60. Ito Y, Nishimura K, Yamanaka K, et al. Necrobiotic xanthogranuloma with paraproteinemia; an atypical case. *Journal der Deutschen Dermatologischen Gesellschaft = Journal of the German Society of Dermatology : JDDG*. 2008;6(1):40-43.
61. Jeziorska M, Hassan A, Mackness MI, et al. Clinical, biochemical, and immunohistochemical features of necrobiotic xanthogranulomatosis. *Journal of clinical pathology*. 2003;56(1):64-68.
62. Johnston KA, Grimwood RE, Meffert JJ, Deering KC. Necrobiotic xanthogranuloma with paraproteinemia: an evolving presentation. *Cutis*. 1997;59(6):333-336.
63. Kadakia S, Nadkarni N, Sonavane S, Ghate S. Spectacular skin nodules: cutaneous necrobiotic xanthogranuloma without paraproteinemia. *Indian journal of dermatology*. 2012;57(5):396-398.
64. Kawakami Y, Yamamoto T. Letter: Necrobiotic xanthogranuloma of extremities in an elderly patient successfully treated with low-dose prednisolone. *Dermatology online journal*. 2011;17(6):13.
65. Keorochana N, Klanarongran K, Satayasootorn K, Chaiamnuay S. Necrobiotic xanthogranuloma scleritis in a case of granulomatosis with polyangiitis (Wegener's granulomatosis). *International medical case reports journal*. 2017;10:323-328.
66. Khan IJ, Azam NA, Sullivan SC, Habboush HW, Christian A. Necrobiotic xanthogranuloma successfully treated with a combination of dexamethasone and oral cyclophosphamide. *Canadian journal of ophthalmology Journal canadien d'ophtalmologie*. 2009;44(3):335-336.

67. Khan M, Ahmed I, Carr R. An unusual subcutaneous lump. *Clinical and experimental dermatology*. 2012;37(7):808-810.
68. Koch D, Lucas G, Durrington P, Lear JT. Ulcerating necrobiotic xanthogranulomata and paraproteinaemia treated with thalidomide. *British Journal of Dermatology*. 2008;159:16-17.
69. Koch PS, Goerdts S, Geraud C. Erythematous papules, plaques, and nodular lesions on the trunk and within preexisting scars. *JAMA dermatology*. 2013;149(9):1103-1104.
70. Kossard S, Chow E, Wilkinson B, Killingsworth M. Lipid and giant cell poor necrobiotic xanthogranuloma. *Journal of cutaneous pathology*. 2000;27(7):374-378.
71. Kovalyshyn I, Busam KJ, Marghoob AA. Orange-yellow diffuse cutaneous eruption in an 82-year-old woman. *Archives of dermatology*. 2009;145(10):1183+1188.
72. Kunikata N, Kikuchi K, Hashimoto A, Tagami H. Necrobiotic xanthogranuloma of the nose without paraproteinemia. *The Journal of dermatology*. 2006;33(11):809-812.
73. Lam K, Brownstein S, Jordan DR, van der Jagt R, Jastrzebski A, Dionne MA. Bilateral necrobiotic xanthogranuloma of the eyelids followed by a diagnosis of multiple myeloma 20 years later. *Ophthalmic plastic and reconstructive surgery*. 2013;29(5):e119-120.
74. Langlois S, Brochot P, Reguiat Z, et al. Necrobiotic xanthogranuloma with multiple myeloma. Case report and pathogenic hypotheses. *Joint, bone, spine : revue du rhumatisme*. 2006;73(1):120-122.
75. Le AV, Fenske NA. An unusual granulomatous disease in the elderly - Necrobiotic xanthogranuloma (NXG) with paraproteinemia. *Archives of dermatology*. 1997;133(10):1303-&.
76. Lebey PB, Determer I, Bazex J, el Sayed F, Marguery MC. Periorbital papules and nodules. Necrobiotic xanthogranuloma. *Archives of dermatology*. 1997;133(1):99, 102.
77. Lebey PB, Determer I, Bazex J, ElSayed F, Marguery MC. Periorbital papules and nodules. *Archives of dermatology*. 1997;133(1):98-&.
78. Lee HJ, Kim JM, Kim GW, et al. Necrobiotic xanthogranuloma treated with a combination of oral methylprednisolone and cyclosporin. *The Journal of dermatology*. 2017;44(10):1190-1191.
79. Li S, Chen AJ, Fang S, Li H. Successful treatment of necrobiotic xanthogranuloma with total glucosides of paeony. *Dermatologic therapy*. 2014;27(5):304-306.
80. Liszewski W, Wisniewski JD, Safah H, Boh EE. Treatment of refractory necrobiotic xanthogranulomas with extracorporeal photopheresis and intravenous immunoglobulin. *Dermatologic therapy*. 2014;27(5):268-271.
81. Luck J, Layton A, Noble BA. Necrobiotic xanthogranuloma with orbital involvement. *Journal of the Royal Society of Medicine*. 1992;85(6):357-358.
82. Lukacs J, Goetze S, Elsner P. Periocular Necrobiotic Xanthogranuloma Successfully Treated with Intravenous Immunoglobulin. *Acta dermato-venereologica*. 2017;97(6):754-755.
83. Macfarlane AW, Verbov JL. Necrobiotic xanthogranuloma with paraproteinaemia. *The British journal of dermatology*. 1985;113(3):339-343.
84. McGregor JM, Miller J, Smith NP, Hay RJ. Necrobiotic xanthogranuloma without periorbital lesions. *Journal of the American Academy of Dermatology*. 1993;29(3):466-469.

85. Machado S, Alves R, Lima M, Leal I, Massa A. Cutaneous necrobiotic xanthogranuloma (NXG)--successfully treated with low dose chlorambucil. *European journal of dermatology : EJD*. 2001;11(5):458-462.
86. Mahendran P, Wee J, Chong H, Natkunarajah J. Necrobiotic xanthogranuloma treated with lenalidomide. *Clinical and experimental dermatology*. 2018;43(3):345-347.
87. Martinez Fernandez M, Rodriguez Prieto MA, Ruiz Gonzalez I, Sanchez Sambucety P, Delgado Vicente S. Necrobiotic xanthogranuloma associated with myeloma. *Journal of the European Academy of Dermatology and Venereology : JEADV*. 2004;18(3):328-331.
88. Mathias M, Permi HS, Shetty P, Jayaprakash Shetty K, Girish BS. Necrobiotic xanthogranuloma presenting as a clinical variant without paraproteinemia. *Nitte University Journal of Health Science*. 2011;1(1-3):72-74.
89. Matsuura F, Yamashita S, Hirano K, et al. Activation of monocytes in vivo causes intracellular accumulation of lipoprotein-derived lipids and marked hypocholesterolemia--a possible pathogenesis of necrobiotic xanthogranuloma. *Atherosclerosis*. 1999;142(2):355-365.
90. Meyer S, Szeimies RM, Landthaler M, Hohenleutner S. Cyclophosphamide-dexamethasone pulsed therapy for treatment of recalcitrant necrobiotic xanthogranuloma with paraproteinemia and ocular involvement. *The British journal of dermatology*. 2005;153(2):443-445.
91. Minocha R, Lee S, Choi JYJ, Mann S. Necrobiotic xanthogranuloma: A report of two fascinating cases. *Hong Kong Journal of Dermatology and Venereology*. 2017;25(2):84-89.
92. Miszkiel KA, Sohaib SAA, Rose GE, Cree IA, Moseley IF. Radiological and clinicopathological features of orbital xanthogranuloma. *British Journal of Ophthalmology*. 2000;84(3):251-258.
93. Mohsenin A, Sinard J, Huang JJ. Necrobiotic xanthogranuloma and chronic lymphocytic leukemia of the conjunctiva masquerading as scleritis and uveitis. *Clinical ophthalmology (Auckland, NZ)*. 2012;6:2045-2047.
94. Muscardin LM, Mastroianni A, Chistolini A, Pulsoni A. Necrobiotic xanthogranuloma without periorbital lesions and without paraproteinaemia. *Journal of the European Academy of Dermatology and Venereology : JEADV*. 2003;17(2):233-235.
95. Naghashpour M, Setoodeh R, Moscinski L, et al. Nonnecrobiotic necrobiotic xanthogranuloma as an initial manifestation of paraproteinemia and small lymphocytic lymphoma in a patient with Sjogren syndrome. *The American Journal of dermatopathology*. 2011;33(8):855-857.
96. Nestle FO, Hofbauer G, Burg G. Necrobiotic xanthogranuloma with monoclonal gammopathy of the IgG lambda type. *Dermatology (Basel, Switzerland)*. 1999;198(4):434-435.
97. Nishimura M, Takano-Nishimura Y, Yano I, Hayashi N, Toshitani S. Necrobiotic xanthogranuloma in a human T-lymphotropic virus type 1 carrier. *Journal of the American Academy of Dermatology*. 1992;27(5 Pt 2):886-889.
98. Nockowski P, Wozniak Z, Reich A, Maj J. Xanthoma-like Skin Changes in an Elderly Woman with a Normal Lipid Profile. *Acta dermatovenerologica Croatica : ADC*. 2017;25(2):167-169.

99. Novak PM, Robbins TO, Winkelmann RK. Necrobiotic xanthogranuloma with myocardial lesions and nodular transformation of the liver. *Human pathology*. 1992;23(2):195-196.
100. Oestreicher J, Dookeran R, Nijhawan N, Kolin A. Necrobiotic xanthogranuloma with predominant periorbital involvement. *Ophthalmic plastic and reconstructive surgery*. 2010;26(6):473-475.
101. Olson RM, Harrison AR, Maltry A, Mokhtarzadeh A. Periorbital Necrobiotic Xanthogranuloma Successfully Treated with Intravenous Immunoglobulin. *Case reports in ophthalmology*. 2018;9(1):70-75.
102. Omarjee L, Janin A, Etienne G, et al. Necrobiotic xanthogranuloma: a paraneoplastic skin lesion of haematological malignancies? *European journal of dermatology : EJD*. 2018;28(3):384-386.
103. Oumeish OY, Oumeish I, Tarawneh M, Salman T, Sharaiha A. Necrobiotic xanthogranuloma associated with paraproteinemia and non-Hodgkin's lymphoma developing into chronic lymphocytic leukemia: the first case reported in the literature and review of the literature. *International journal of dermatology*. 2006;45(3):306-310.
104. Pedrosa AF, Ferreira O, Calistru A, et al. Necrobiotic xanthogranuloma with giant cell hepatitis, successfully treated with intravenous immunoglobulins. *Dermatologic therapy*. 2015;28(2):68-70.
105. Peyman A, Walsh N, Green P, Dorey MW, Seamone C, Pasternak S. Necrobiotic xanthogranuloma associated with necrotizing scleritis. *The American Journal of dermatopathology*. 2012;34(6):644-647.
106. Plotnick H, Taniguchi Y, Hashimoto K, Negendank W, Tranchida L. Periorbital necrobiotic xanthogranuloma and stage I multiple myeloma. Ultrastructure and response to pulsed dexamethasone documented by magnetic resonance imaging. *Journal of the American Academy of Dermatology*. 1991;25(2 Pt 2):373-377.
107. Randell PL, Heenan PJ. Necrobiotic xanthogranuloma with paraproteinaemia. *The Australasian journal of dermatology*. 1999;40(2):114-115.
108. Rashid MM, Chowdhury T, Sultana A, Begum R, Islam S, Ahmed I. Necrobiotic xanthogranuloma - A case report. *Journal of Pakistan Association of Dermatologists*. 2009;19(3):175-177.
109. Rayner SA, Duncombe AS, Keefe M, Theaker J, Manners RM. Necrobiotic xanthogranuloma occurring in an eyelid scar. *Orbit (Amsterdam, Netherlands)*. 2008;27(3):191-194.
110. Reddy VC, Salomao DR, Garrity JA, Baratz KH, Patel SV. Periorbital and ocular necrobiotic xanthogranuloma leading to perforation. *Archives of ophthalmology (Chicago, Ill : 1960)*. 2010;128(11):1493-1494.
111. Reeder CB, Connolly SM, Winkelmann RK. The evolution of Hodgkin's disease and necrobiotic xanthogranuloma syndrome. *Mayo Clinic proceedings*. 1991;66(12):1222-1224.
112. Rose GE, Patel BC, Garner A, Wright JE. Orbital xanthogranuloma in adults. *The British journal of ophthalmology*. 1991;75(11):680-684.
113. Rose A, Robinson M, Kamino H, Latkowski JA. Necrobiotic xanthogranuloma. *Dermatology online journal*. 2012;18(12):30.

114. Rubinstein A, Wolf DJ, Granstein RD. Successful treatment of necrobiotic xanthogranuloma with intravenous immunoglobulin. *Journal of cutaneous medicine and surgery*. 2013;17(5):347-350.
115. Russo GG. Necrobiotic xanthogranuloma with scleroderma. *Cutis*. 2002;70(6):311-316.
116. Ryan E, Warren LJ, Szabo F. Necrobiotic xanthogranuloma: response to chlorambucil. *The Australasian journal of dermatology*. 2012;53(2):e23-25.
117. Saeki H, Tomita M, Kai H, et al. Necrobiotic xanthogranuloma with paraproteinemia successfully treated with melphalan, prednisolone and skin graft. *The Journal of dermatology*. 2007;34(11):795-797.
118. Sagiv O, Thakar SD, Morrell G, Tetzlaff MT, Esmaeli B. Rituximab Monotherapy Is Effective in Treating Orbital Necrobiotic Xanthogranuloma. *Ophthalmic plastic and reconstructive surgery*. 2018;34(1):e24-e27.
119. Santosaputri E, Ellis EJ, Nagiah S, Chrispal A, Thomas A. A multisystem granulomatous disease: necrobiotic xanthogranuloma with hepatic involvement. *The Medical journal of Australia*. 2014;200(8):490-493.
120. Schaudig U, Al-Samir K. Upper and lower eyelid reconstruction for severe disfiguring necrobiotic xanthogranuloma. *Orbit (Amsterdam, Netherlands)*. 2004;23(1):65-76.
121. Scupham RK, Fretzin DF. Necrobiotic xanthogranuloma with paraproteinemia. *Archives of pathology & laboratory medicine*. 1989;113(12):1389-1391.
122. Seastrom S, Bookout A, Hogan DJ. Necrobiotic xanthogranuloma without a monoclonal gammopathy. *Cutis*. 2014;94(6):293-296.
123. Sfeir JG, Zogala RJ, Popii VB. Hypercalcemia in Necrobiotic Xanthogranuloma: First Reported Case and Insight Into Treatment. *Journal of bone and mineral research : the official journal of the American Society for Bone and Mineral Research*. 2017;32(4):784-787.
124. Shah KC, Poonnoose SI, George R, Jacob M, Rajshekhar V. Necrobiotic xanthogranuloma with cutaneous and cerebral manifestations. Case report and review of the literature. *Journal of neurosurgery*. 2004;100(6):1111-1114.
125. Silapunt S, Chon SY. Generalized necrobiotic xanthogranuloma successfully treated with lenalidomide. *Journal of drugs in dermatology : JDD*. 2010;9(3):273-276.
126. Singh K, Rajan KD, Eberhart C. Orbital necrobiotic xanthogranuloma associated with systemic IgG4 disease. *Ocular immunology and inflammation*. 2010;18(5):373-378.
127. Smith HG, Sargent LA, Lundgrin DB. Necrobiotic xanthogranuloma of the chest wall. *Dermatology online journal*. 2006;12(1):12.
128. Stork J, Kodetova D, Vosmik F, Krejca M. Necrobiotic xanthogranuloma presenting as a solitary tumor. *The American Journal of dermatopathology*. 2000;22(5):453-456.
129. Sutton L, Sutton S, Sutton M. Treatment of necrobiotic xanthogranuloma with 2-chlorodeoxyadenosine. *Skinmed*. 2013;11(2):121-123.
130. Szalat R, Arnulf B, Karlin L, et al. Pathogenesis and treatment of xanthomatosis associated with monoclonal gammopathy. *Blood*. 2011;118(14):3777-3784.
131. Szalat R, Pirault J, Femand JP, et al. Physiopathology of necrobiotic xanthogranuloma with monoclonal gammopathy. *Journal of internal medicine*. 2014;276(3):269-284.
132. Torabian SZ, Fazel N, Knuttle R. Necrobiotic xanthogranuloma treated with chlorambucil. *Dermatology online journal*. 2006;12(5):11.

133. Tucker NA, Discepolo MJ, Blanco G, Burnier MN, Jr. Necrobiotic xanthogranuloma without dermatologic involvement. *Canadian journal of ophthalmology Journal canadien d'ophtalmologie*. 1997;32(6):396-399.
134. Umberto I, Winkelmann RK. Necrobiotic xanthogranuloma with cardiac involvement. *The British journal of dermatology*. 1995;133(3):438-443.
135. Valentine EA, Friedman HD, Zamkoff KW, Streeten BW. Necrobiotic xanthogranuloma with IgA multiple myeloma: a case report and literature review. *American journal of hematology*. 1990;35(4):283-285.
136. Venencie PY, Puissant A, Verola O, et al. Necrobiotic xanthogranuloma with myeloma. A case report. *Cancer*. 1987;59(3):588-592.
137. Venencie PY, Le Bras P, Toan ND, Tchernia G, Delfraissy JF. Recombinant interferon alfa-2b treatment of necrobiotic xanthogranuloma with paraproteinemia. *Journal of the American Academy of Dermatology*. 1995;32(4):666-667.
138. Vieira V, Del Pozo J, Martinez W, Veiga-Barreiro JA, Fonseca E. Necrobiotic xanthogranuloma associated with lymphoplasmacytic lymphoma. Palliative treatment with carbon dioxide laser. *European journal of dermatology : EJD*. 2005;15(3):182-185.
139. Vignon M, Placais L, Malphettes M, et al. Non-cirrhotic portal hypertension in necrobiotic xanthogranuloma associated with monoclonal gammopathy. *Journal of the European Academy of Dermatology and Venereology : JEADV*. 2017;31(9):e403-e405.
140. Vu K, Gupta R, Frater J, Atkinson J, Ranganathan P. A 55-Year-Old Man With Periorbital and Inguinal Masses, Pericarditis, and Pleuritis. *Arthritis Care and Research*. 2017;69(5):730-736.
141. Wee SA, Shupack JL. Necrobiotic xanthogranuloma. *Dermatology online journal*. 2005;11(4):24.
142. Wei YH, Cheng JJ, Wu YH, et al. Necrobiotic xanthogranuloma: response to dapsone. *Dermatologic therapy*. 2015;28(1):7-9.
143. Wells J, Gillespie R, Zardawi I. Case of recalcitrant necrobiotic xanthogranuloma. *The Australasian journal of dermatology*. 2004;45(4):213-215.
144. Winkelmann RK, Litzow MR, Umberto IJ, Lie JT. Giant cell granulomatous pulmonary and myocardial lesions in necrobiotic xanthogranuloma with paraproteinemia. *Mayo Clinic proceedings*. 1997;72(11):1028-1033.
145. Wolz M, Peters MS. Necrobiotic xanthogranuloma of the extremities. *Journal of drugs in dermatology : JDD*. 2012;11(1):122-123.
146. Wruhs M, Feldmann R, Sawetz I, Breier F, Steiner A. Necrobiotic Xanthogranuloma in a Patient with Multiple Myeloma. *Case reports in dermatology*. 2016;8(3):350-353.
147. Yang CY, Chung WH, Rosaline CYH, Kuo TT, Yang CH. Necrobiotic xanthogranuloma with paraproteinemia without periorbital involvement - A case report. *Dermatologica Sinica*. 2010;28(3):125-129.
148. Yasukawa K, Kato N, Hamasaka A, Hata H. Necrobiotic xanthogranuloma: isolated skeletal muscle involvement and unusual changes. *Journal of the American Academy of Dermatology*. 2005;52(4):729-731.
149. Yoon SY, Park HJ, Lee JY, Cho BK. Necrobiotic xanthogranuloma with multiple myeloma and no periorbital involvement. *Ann Dermatol*. 2007;19(1):22-24.
150. Zainal A, Razif MY, Makhshen M, Swaminathan M, Mazita A. Necrobiotic xanthogranuloma of the parotid gland. *The Journal of laryngology and otology*. 2010;124(5):569-571.

151. Zelger B, Eisendle K, Mensing C, Zelger B. Detection of spirochetal micro-organisms by focus-floating microscopy in necrobiotic xanthogranuloma. *Journal of the American Academy of Dermatology*. 2007;57(6):1026-1030.
152. Ziemer M, Wedding U, Sander CS, Elsner P. Necrobiotic xanthogranuloma-rapid progression under treatment with melphalan. *European journal of dermatology : EJD*. 2005;15(5):363-365.
153. Ziemer M, Norgauer J, Simon JC, Koehler MJ. An unusual histologic variant of necrobiotic xanthogranuloma. *The American Journal of dermatopathology*. 2012;34(2):e22-26.
